# Supplementary material
Source: Springer Nature journal article supplement (https://www.springermedizin.de/resource/supplementary/12947_2012_430_MOESM1_ESM.pdf/9555720)

LVV (mL)

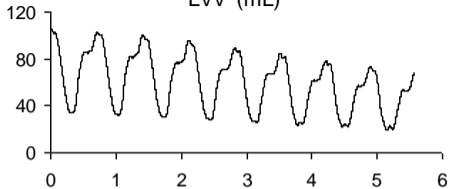

LVP (mm Hg)

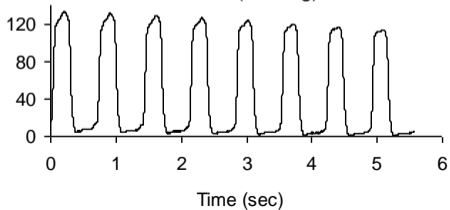

LVP (mm Hg)

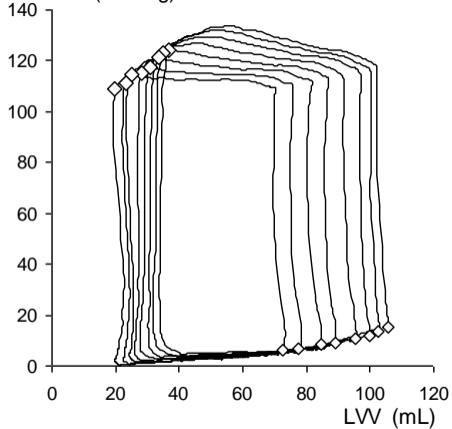

Supplement: MOESM1 [file 9555720]
